# Supplementary material
Source: PubMed Central journal article supplement (PMC4526343)

# FIGURE S1

**a**

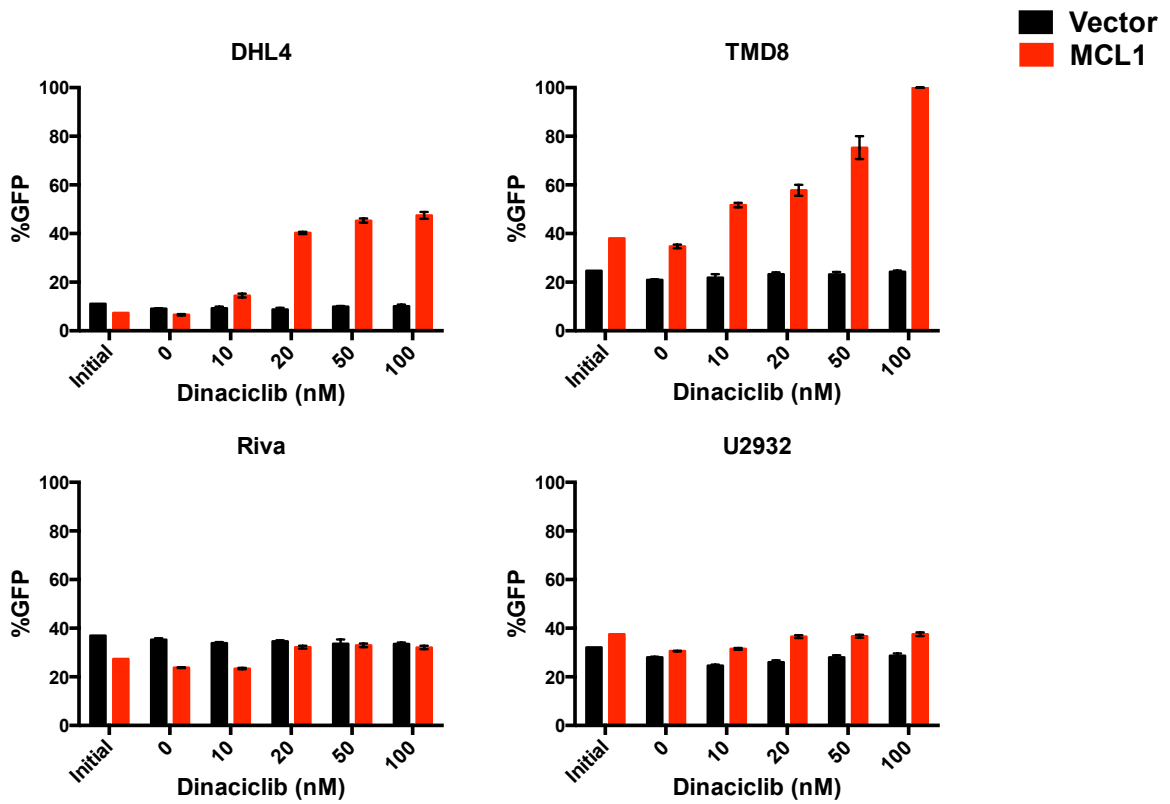

**b**

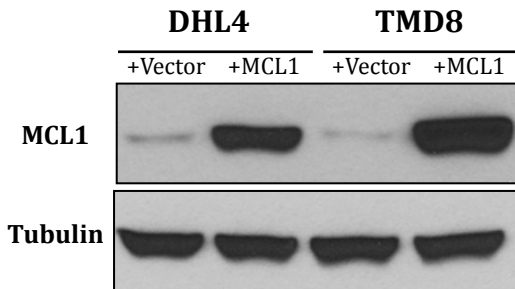

**c**

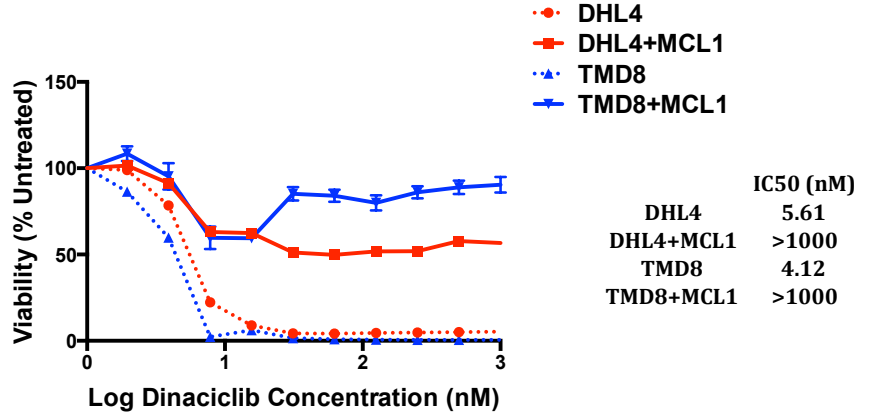

**d**

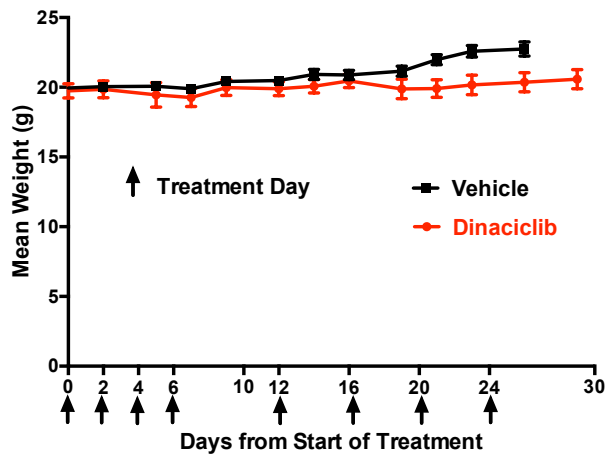

Supplement: NIHMS679156-supplement-2.pdf [file NIHMS679156-supplement-2.pdf]

# FIGURE S2

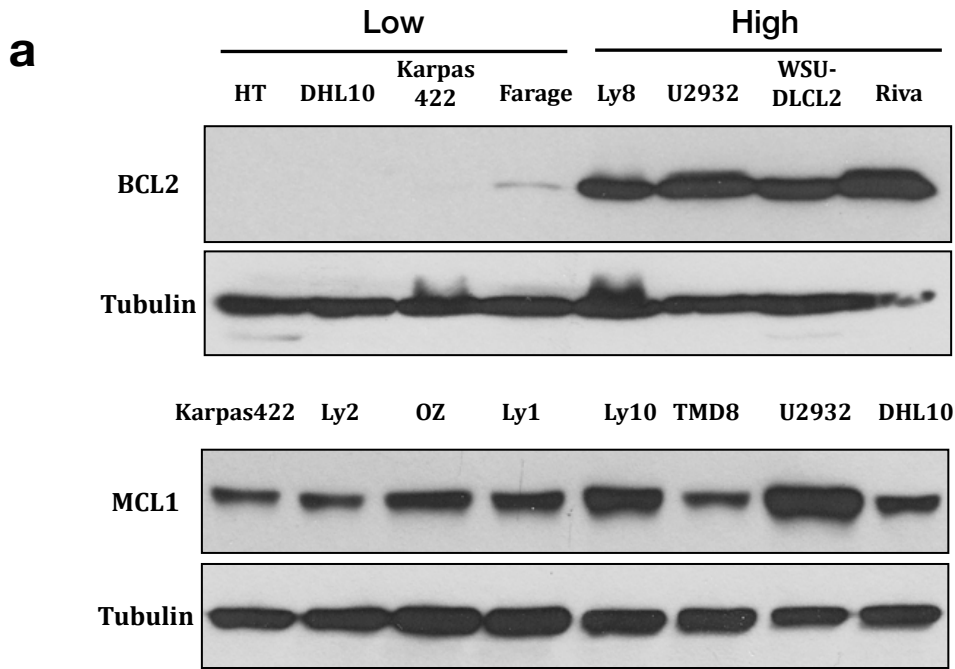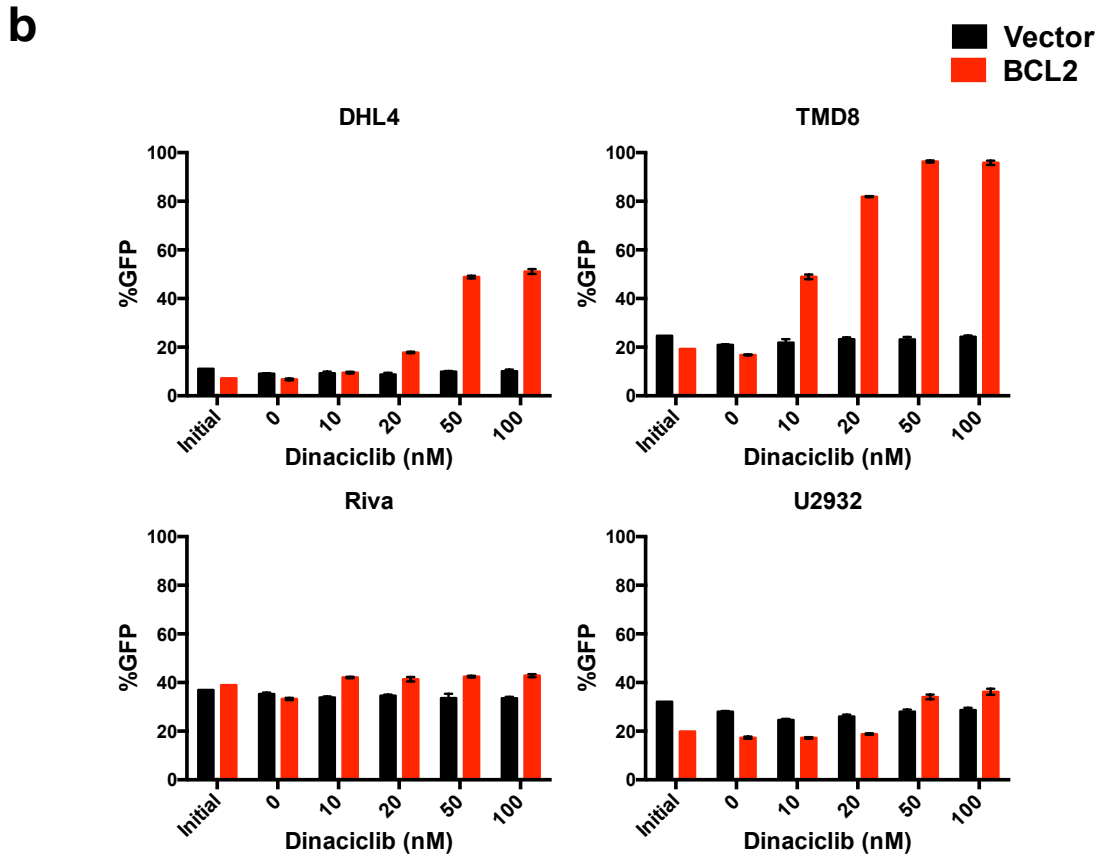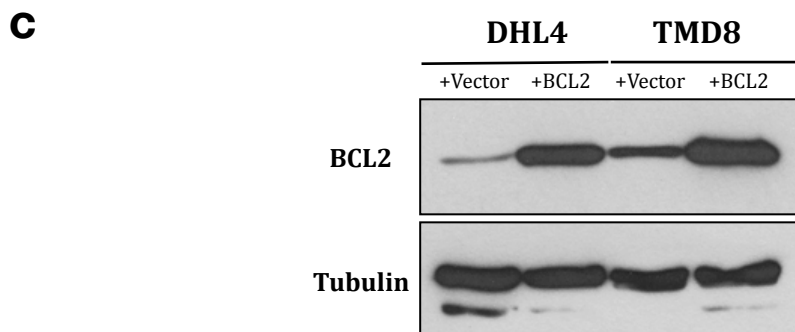

Supplement: NIHMS679156-supplement-3.pdf [file NIHMS679156-supplement-3.pdf]

# FIGURE S3

**a**

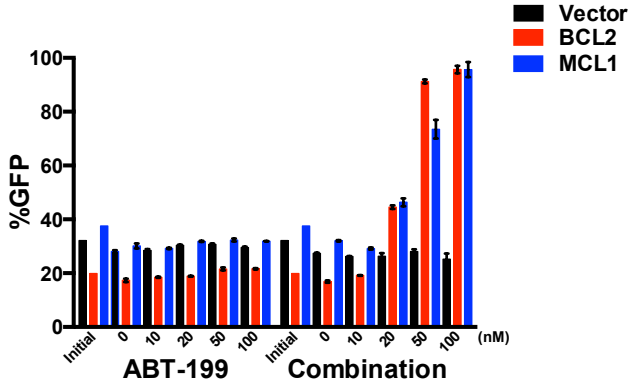

**c**

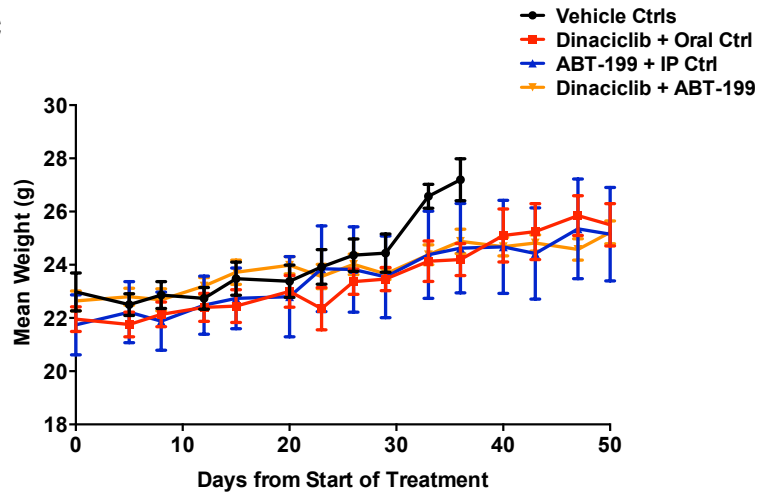

**b**

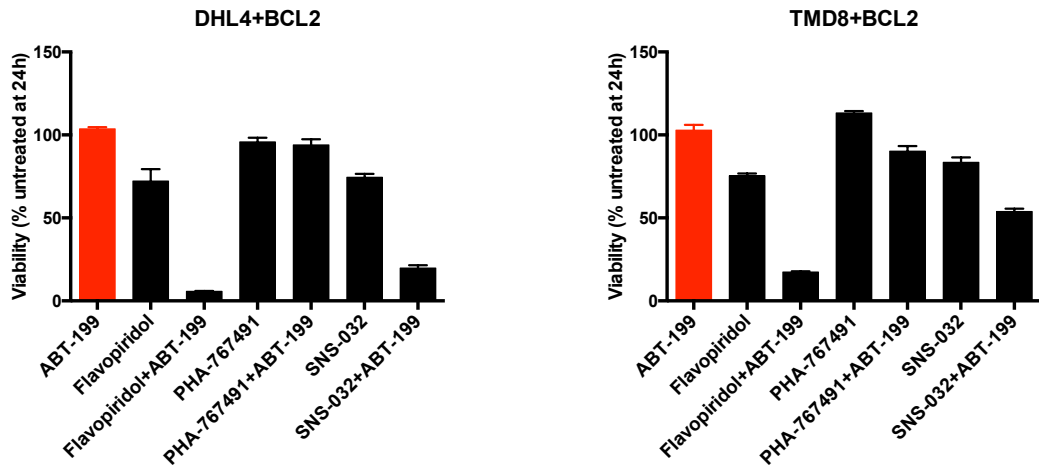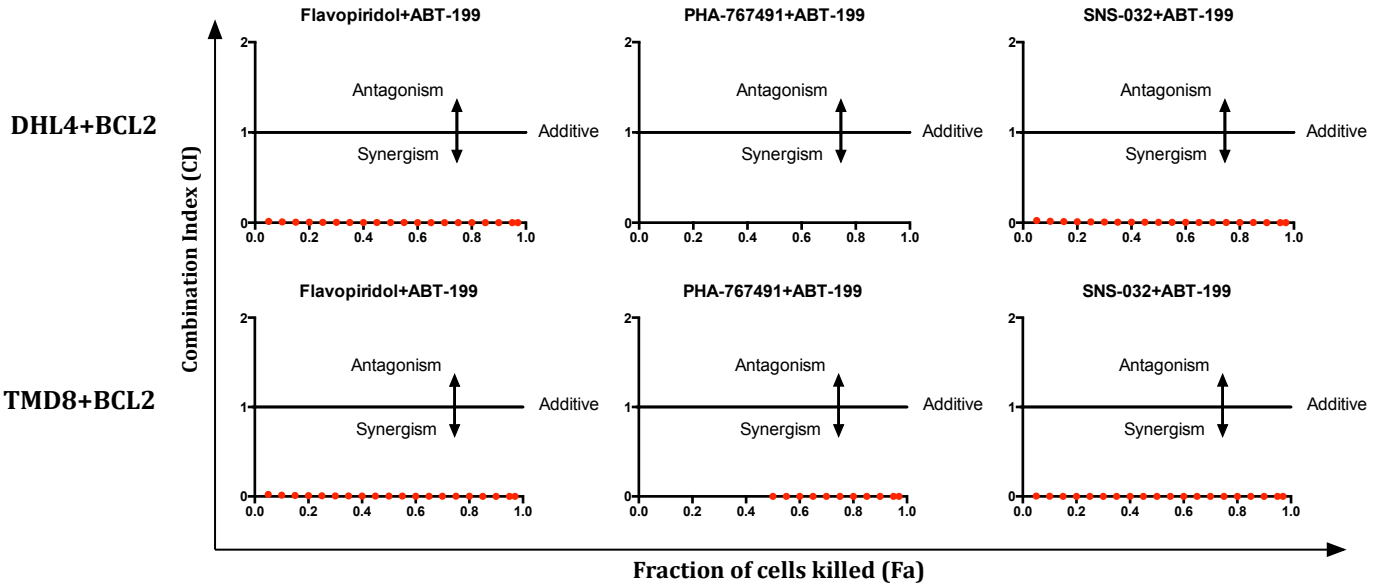

Supplement: NIHMS679156-supplement-4.pdf [file NIHMS679156-supplement-4.pdf]

# FIGURE S4

**a**

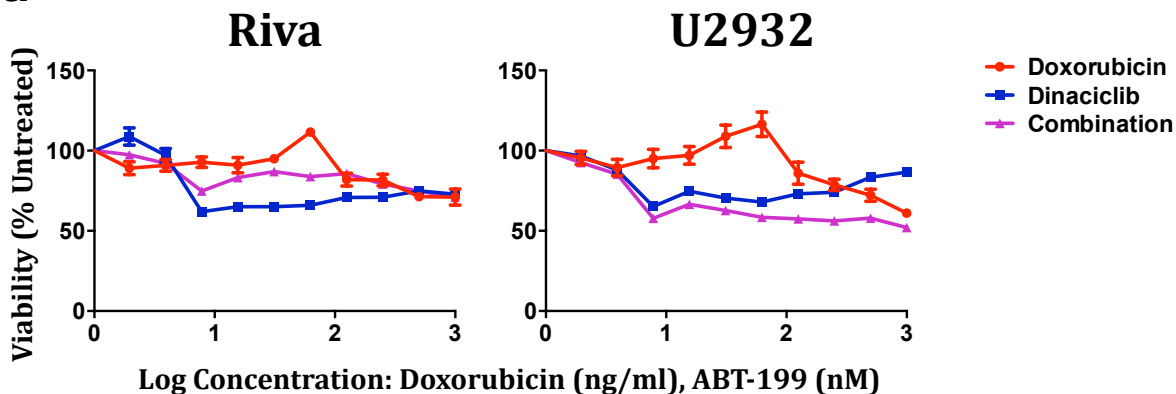

**b**

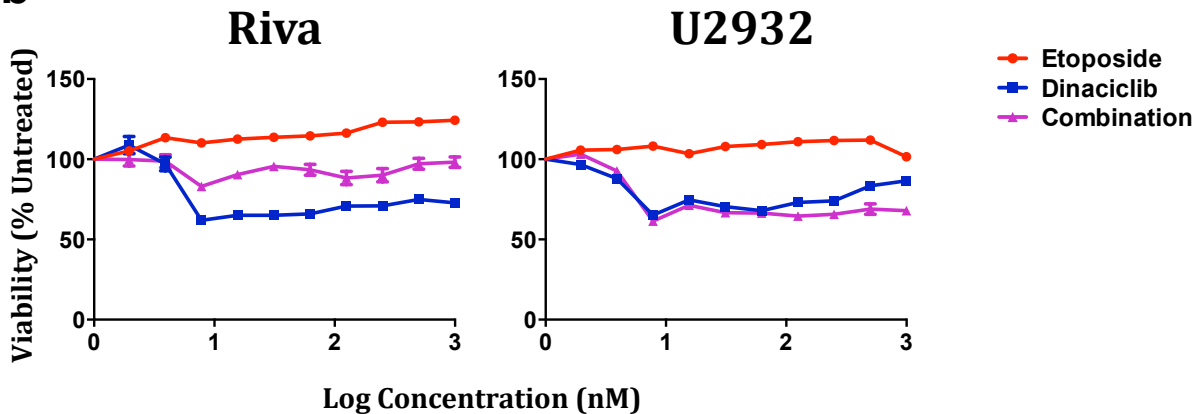

**c**

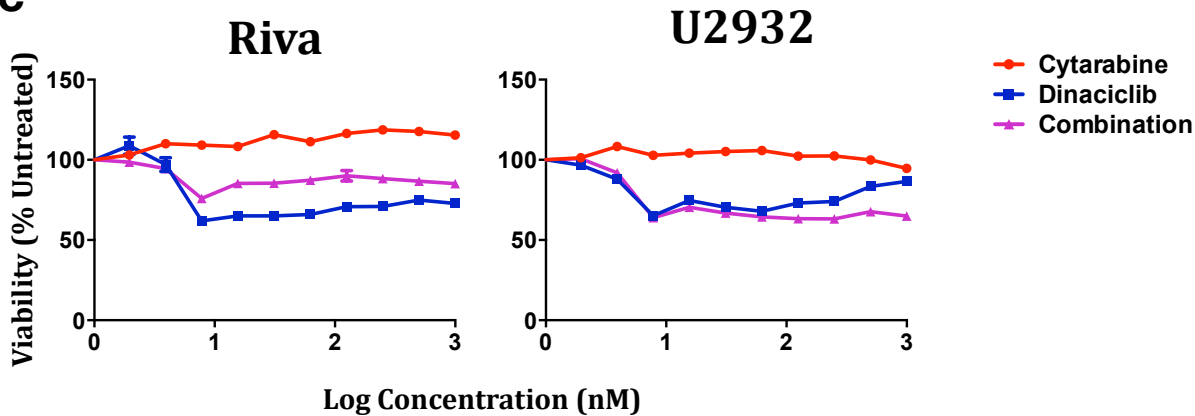

Supplement: NIHMS679156-supplement-5.pdf [file NIHMS679156-supplement-5.pdf]
